# Supplementary material for: Association of nucleoid proteins with coding and non-coding segments of the Escherichia coli genome
Source: PubMed Central journal article supplement — Nucleic Acids Res. 2006 Sep 8;34(16):4642–52. doi: 10.1093/nar/gkl542 (PMC1636352; doi:10.1093/nar/gkl542), 2006-09-08
Supplement: nar_gkl542_1.pdf [file nar_gkl542_1.pdf]

# Supplementary Figure 1

## A

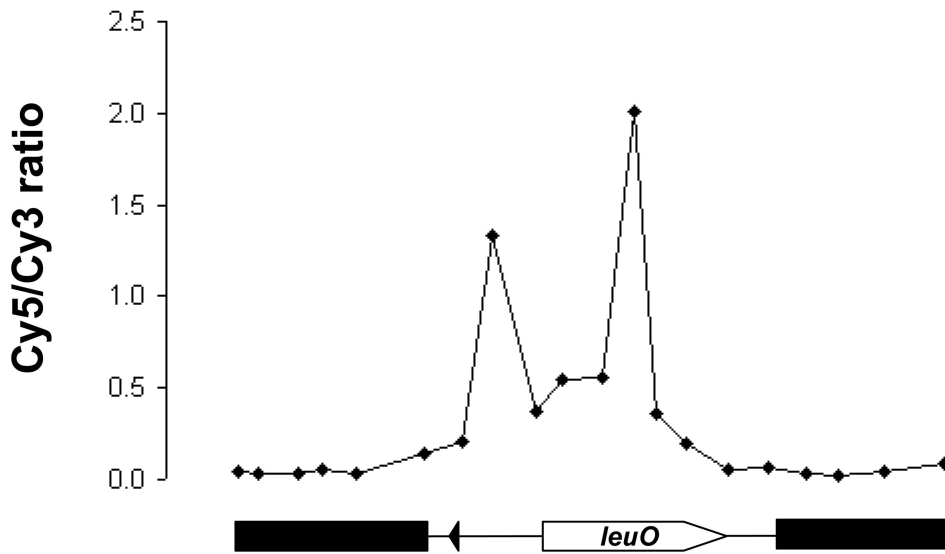

## B

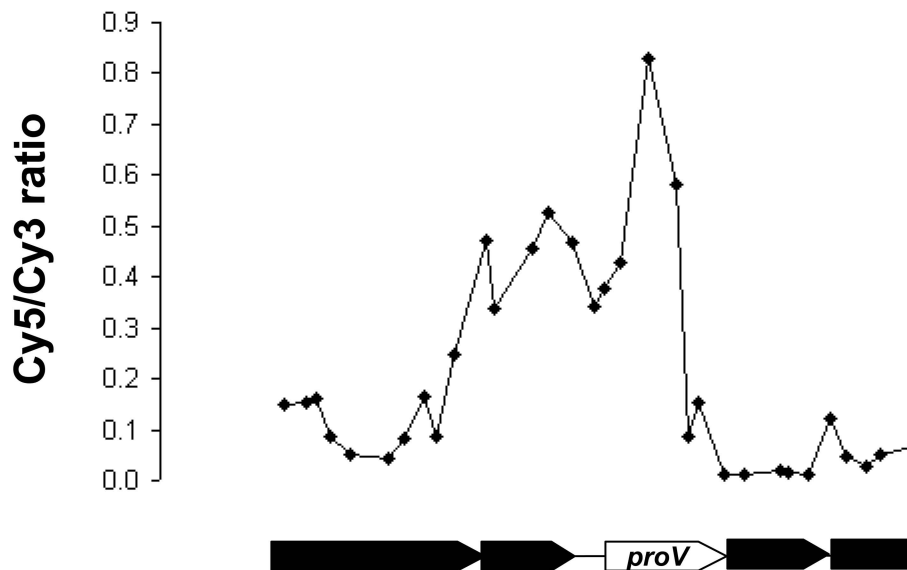

**Supplementary Figure 1. Association H-NS with the *leuO* and *proV* loci.** The figure shows results from ChIP-chip experiments that measure the profile of H-NS binding across segments of the *E. coli* genome that are illustrated schematically below the profile. Binding signals (y-axis) are plotted against the genomic location (x-axis) of two known targets; *leuO* (panel A) and *proV* (panel B).
